# Supplementary material
Source: publisher site journal article supplement (https://zookeys.pensoft.net/article/6226/download/suppl/313/)

### wing landmarks

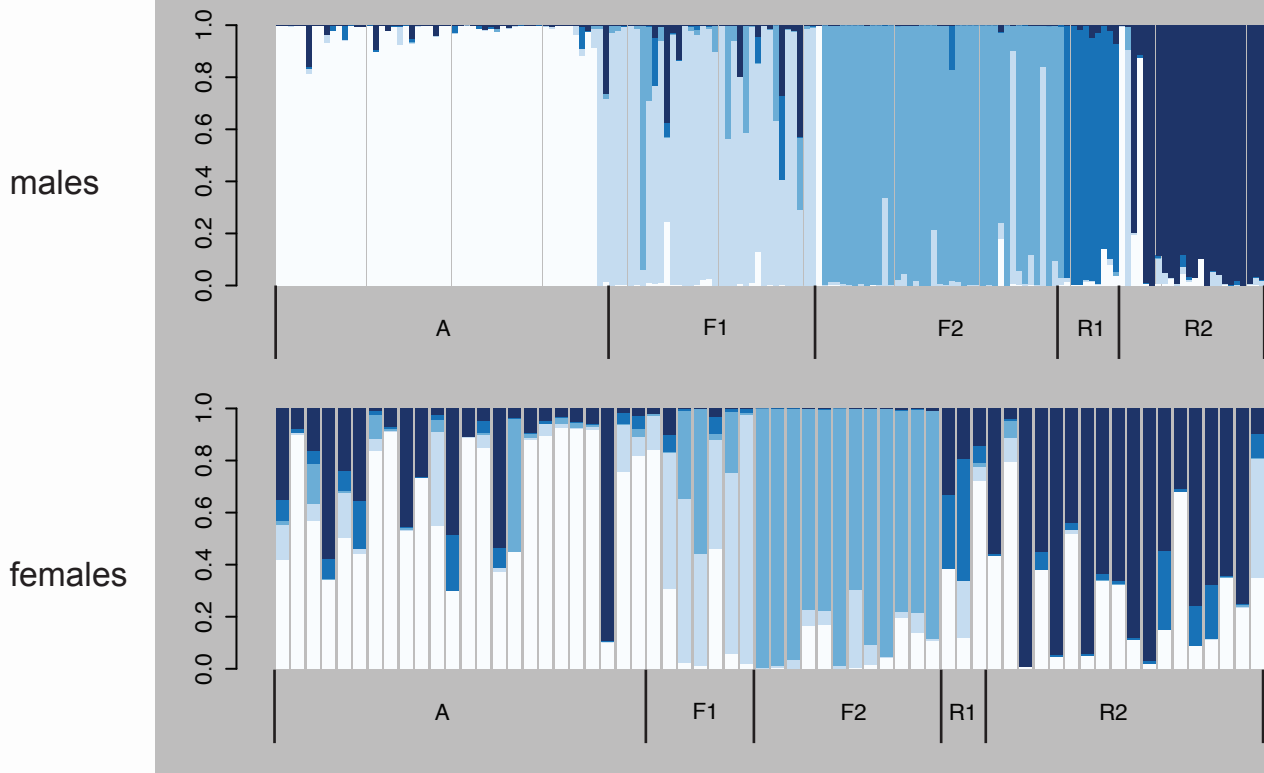

### wing band areas

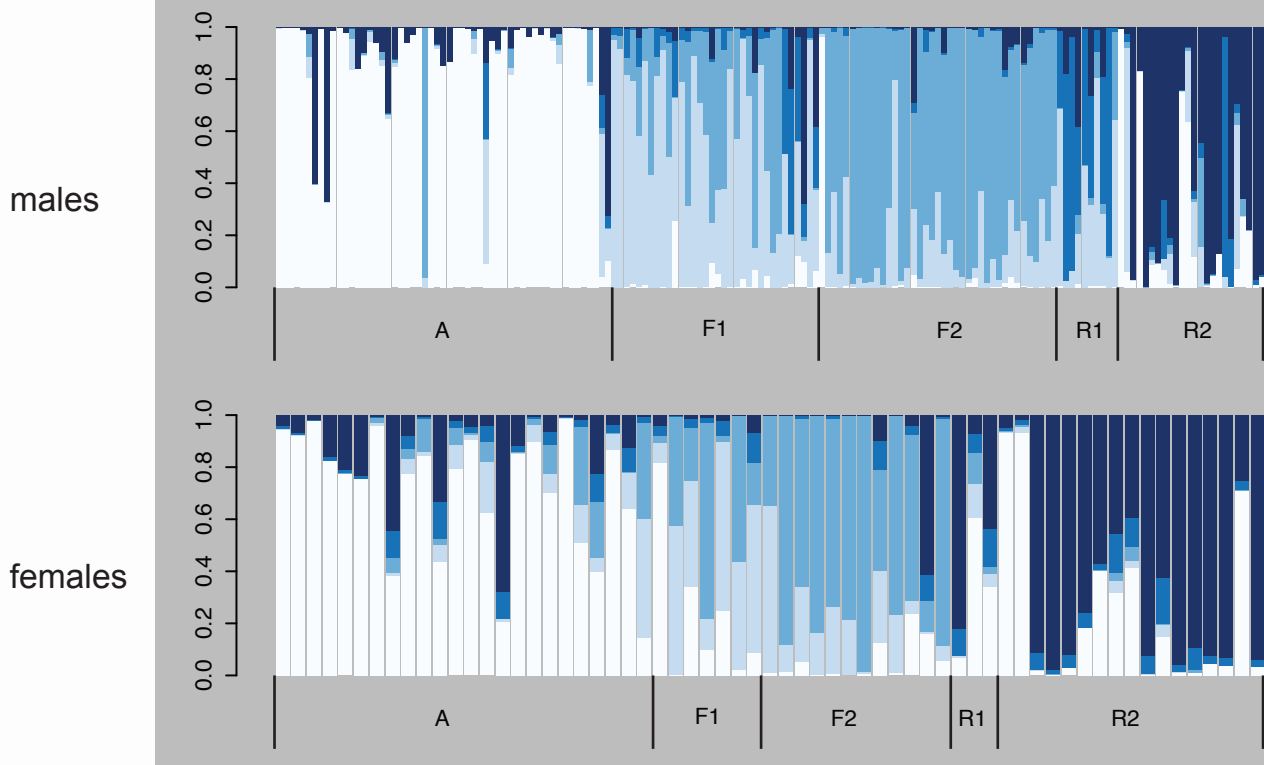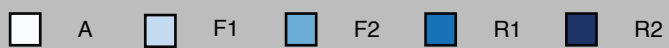

Supplement: Supplementary file
